# Supplementary material for: Theoretical investigation on the effect of ancillary ligand modification for highly efficient phosphorescent platinum(ii) complex design
Source: Royal Society of Chemistry journal article supplement (doi:10.1039/c7ra00705a), 2017-01-01
Supplement: c7ra00705a1.pdf [file c7ra00705a1.pdf]

## Supplementary Information

# Theoretical investigation on the effect of ancillary ligand modification for highly efficient phosphorescent platinum(II) complexes design

Hong-Wei Fan, Fu-Quan Bai,\* Zhi-Xiang Zhang, Yu Wang, Ze-Xing Qu, Rong-  
Lin Zhong, Hong-Xing Zhang\*

*International Joint Research Laboratory of Nano-Micro Architecture Chemistry, Laboratory of  
Theoretical and Computational Chemistry, Institute of Theoretical Chemistry, Jilin University,  
Changchun 130023, People's Republic of China*

*E-mail: baifq@jlu.edu.cn (F.-Q. Bai), zhanghx@mail.jlu.edu.cn (H.-X. Zhang).*

Table S1. Calculated emission wavelengths at optimized  $T_1$  geometries of complex **1** by different functionals with its experimental data (nm).

|          | Exp | M062x | PBE0 | B3LYP | B3P86 | CAM-<br>B3LYP |
|----------|-----|-------|------|-------|-------|---------------|
| <b>1</b> | 505 | 537   | 697  | 658   | 667   | 739           |

Table S2. Molecular orbital (MO) compositions at the S<sub>0</sub> state for complex **1**.

| Complex  | Orbital | Energy(eV) | MO composition (%) |     |     |
|----------|---------|------------|--------------------|-----|-----|
|          |         |            | Pt                 | bzq | dpm |
| <b>1</b> | L+3     | 0.017      | 4                  | 97  | 1   |
|          | L+2     | -0.676     | 3                  | 4   | 94  |
|          | L+1     | -1.029     | 3                  | 93  | 4   |
|          | L       | -1.688     | 4                  | 94  | 2   |
|          | H       | -5.659     | 33                 | 46  | 21  |
|          | H-1     | -6.091     | 36                 | 22  | 42  |
|          | H-2     | -6.372     | 90                 | 7   | 4   |
|          | H-3     | -6.551     | 14                 | 68  | 18  |

Table S3. Molecular orbital (MO) compositions at the S<sub>0</sub> state for complex **2**.

| Complex  | Orbital | Energy(eV) | MO composition (%) |     |     |
|----------|---------|------------|--------------------|-----|-----|
|          |         |            | Pt                 | bzq | ppy |
| <b>2</b> | L+3     | -0.765     | 2                  | 15  | 84  |
|          | L+2     | -0.883     | 2                  | 72  | 26  |
|          | L+1     | -1.327     | 4                  | 42  | 55  |
|          | L       | -1.670     | 3                  | 69  | 28  |
|          | H       | -5.582     | 41                 | 54  | 5   |
|          | H-1     | -5.683     | 49                 | 6   | 44  |
|          | H-2     | -5.976     | 85                 | 7   | 7   |
|          | H-3     | -6.466     | 9                  | 7   | 84  |

Table S4. Molecular orbital (MO) compositions at the S<sub>0</sub> state for complex **3**.

| Complex  | Orbital | Energy(eV) | MO composition (%) |     |      |
|----------|---------|------------|--------------------|-----|------|
|          |         |            | Pt                 | bzq | Ncaz |
| <b>3</b> | L+3     | -0.003     | 4                  | 32  | 65   |
|          | L+2     | -0.851     | 2                  | 69  | 29   |
|          | L+1     | -1.177     | 3                  | 39  | 58   |
|          | L       | -1.607     | 3                  | 85  | 12   |
|          | H       | -5.470     | 30                 | 4   | 66   |
|          | H-1     | -5.606     | 43                 | 54  | 4    |
|          | H-2     | -5.957     | 88                 | 5   | 7    |
|          | H-3     | -6.028     | 11                 | 4   | 85   |

Table S5. Molecular orbital (MO) compositions at the S<sub>0</sub> state for complex **4**.

| Complex  | Orbital | Energy(eV) | MO composition (%) |     |      |
|----------|---------|------------|--------------------|-----|------|
|          |         |            | Pt                 | bzq | Ndbt |
| <b>4</b> | L+3     | -0.603     | 1                  | 5   | 95   |
|          | L+2     | -0.965     | 3                  | 82  | 15   |
|          | L+1     | -1.411     | 3                  | 40  | 57   |
|          | L       | -1.743     | 3                  | 68  | 29   |
|          | H       | -5.693     | 40                 | 55  | 4    |
|          | H-1     | -5.732     | 40                 | 6   | 54   |
|          | H-2     | -6.099     | 90                 | 6   | 5    |
|          | H-3     | -6.450     | 4                  | 10  | 86   |

Table S6. Molecular orbital (MO) compositions at the lowest-lying triplet state for complexes **1-4**. (The L represents the ppy, Ncaz and Ndbt)

| Complexes | Orbital | MO composition (%) |     |    |
|-----------|---------|--------------------|-----|----|
|           |         | Pt                 | bzq | L  |
| <b>1</b>  | L       | 2                  | 81  | 17 |
|           | H       | 19                 | 68  | 12 |
|           | H-2     | 28                 | 59  | 13 |
| <b>2</b>  | L+1     | 5                  | 27  | 68 |
|           | L       | 2                  | 91  | 7  |
|           | H       | 21                 | 74  | 5  |
| <b>3</b>  | L       | 1                  | 95  | 4  |
|           | H       | 19                 | 50  | 31 |
|           | H-1     | 23                 | 27  | 50 |
| <b>4</b>  | L+1     | 5                  | 26  | 69 |
|           | L       | 1                  | 93  | 6  |
|           | H       | 19                 | 74  | 7  |

Table S7. The main transitions, oscillator strengths and vertical excitation energy of complex **1**.

| States          | Oscillator Strength | Energy (eV) | Transition (CI)                 |
|-----------------|---------------------|-------------|---------------------------------|
| T <sub>1</sub>  | ---                 | 2.3088      | H-2→L(-0.26)<br>H→L(0.59)       |
| T <sub>2</sub>  | ---                 | 3.0467      | H-1→L+2(0.61)<br>H→L+2(-0.31)   |
| T <sub>3</sub>  | ---                 | 3.1765      | H→L(-0.28)<br>H→L+1(0.51)       |
| S <sub>1</sub>  | 0.1681              | 3.3401      | H→L(0.66)                       |
| S <sub>2</sub>  | 0.0688              | 3.8469      | H→L(0.20)<br>H→L+2(0.46)        |
| S <sub>3</sub>  | 0.1724              | 4.2005      | H-1→L(0.56)                     |
| S <sub>4</sub>  | 0.1706              | 4.2586      | H-2→L(0.51)                     |
| S <sub>5</sub>  | 0.0046              | 4.2811      | H-3→L(0.66)                     |
| S <sub>6</sub>  | 0.0592              | 4.4535      | H-4→L(-0.25)<br>H-2→L+1(0.51)   |
| S <sub>7</sub>  | 0.1215              | 4.4716      | H-1→L+2(0.42)<br>H→L+2(-0.37)   |
| S <sub>10</sub> | 0.0182              | 4.6846      | H-2→L+1(-0.20)<br>H-1→L+2(0.23) |



Table S8. The main transitions, oscillator strengths and vertical excitation energy of complex **2**.

| States          | Oscillator Strength | Energy (eV) | Transition (CI) |
|-----------------|---------------------|-------------|-----------------|
| T <sub>1</sub>  | ---                 | 2.3136      | H→L(0.58)       |
|                 |                     |             | H→L+1(-0.22)    |
| T <sub>2</sub>  | ---                 | 3.0962      | H→L(0.30)       |
|                 |                     |             | H→L+1(-0.36)    |
| T <sub>3</sub>  | ---                 | 3.1639      | H-1→L(0.25)     |
|                 |                     |             | H-1→L+1(0.51)   |
| S <sub>1</sub>  | 0.1479              | 3.3401      | H→L(0.66)       |
| S <sub>2</sub>  | 0.0459              | 3.6923      | H-1→L(0.38)     |
|                 |                     |             | H-1→L+1(0.51)   |
| S <sub>3</sub>  | 0.3054              | 3.7838      | H→L+1(0.52)     |
|                 |                     |             | H→L+2(-0.27)    |
| S <sub>4</sub>  | 0.0539              | 3.9628      | H-2→L(0.53)     |
|                 |                     |             | H-2→L+1(0.31)   |
| S <sub>5</sub>  | 0.1175              | 4.0547      | H-3→L(0.32)     |
|                 |                     |             | H-2→L(0.29)     |
|                 |                     |             | H→L+2(0.26)     |
| S <sub>6</sub>  | 0.0394              | 4.1541      | H-3→L(0.33)     |
|                 |                     |             | H-1→L(0.40)     |
| S <sub>7</sub>  | 0.0089              | 4.2635      | H-3→L+1(-0.24)  |
|                 |                     |             | H-2→L(-0.27)    |
|                 |                     |             | H-2→L+1(0.46)   |
| S <sub>8</sub>  | 0.0268              | 4.3255      | H-3→L(0.40)     |
|                 |                     |             | H-2→L+1(0.33)   |
| S <sub>9</sub>  | 0.0369              | 4.5386      | H-3→L+1(-0.24)  |
|                 |                     |             | H-1→L+1(0.39)   |
|                 |                     |             | H→L+1(0.21)     |
| S <sub>10</sub> | 0.0770              | 4.5644      | H-4→L(0.24)     |
|                 |                     |             | H-4→L+1(0.48)   |

Table S9. The main transitions, oscillator strengths and vertical excitation energy of complex **3**.

| States          | Oscillator Strength | Energy (eV) | Transition (CI)                                |
|-----------------|---------------------|-------------|------------------------------------------------|
| T <sub>1</sub>  | ---                 | 2.3429      | H-1→L(-0.28)<br>H→L(0.50)                      |
| T <sub>2</sub>  | ---                 | 3.1316      | H-1→L(-0.20)<br>H→L+1(0.37)<br>H→L+2(-0.26)    |
| S <sub>1</sub>  | 0.1392              | 3.3529      | H-1→L(-0.44)<br>H→L(0.50)                      |
| S <sub>2</sub>  | 0.1310              | 3.6992      | H-1→L+1(0.41)<br>H→L(0.32)<br>H→L+1(0.20)      |
| S <sub>3</sub>  | 0.2641              | 3.8328      | H-1→L+2(0.24)<br>H→L+1(0.53)                   |
| S <sub>4</sub>  | 0.0260              | 4.0411      | H-3→L(0.53)<br>H-3→L+1(0.25)                   |
| S <sub>5</sub>  | 0.0400              | 4.0644      | H-3→L(0.32)<br>H-1→L+1(0.37)<br>H→L(-0.23)     |
| S <sub>6</sub>  | 0.1074              | 4.1581      | H-4→L(-0.29)<br>H-2→L+1(0.38)<br>H→L+2(-0.21)  |
| S <sub>7</sub>  | 0.0723              | 4.2439      | H-4→L(0.39)<br>H-2→L(0.20)<br>H-2→L+1(0.32)    |
| S <sub>8</sub>  | 0.0117              | 4.3249      | H-3→L(-0.26)<br>H-3→L+1(0.39)                  |
| S <sub>9</sub>  | 0.0679              | 4.3867      | H-4→L(0.25)<br>H-4→L+1(0.30)<br>H-2→L+1(-0.21) |
| S <sub>10</sub> | 0.0337              | 4.5140      | H-1→L+2(-0.20)                                 |

Table S10. The main transitions, oscillator strengths and vertical excitation energy of complex 4.

| States          | Oscillator Strength | Energy (eV) | Transition (CI)                                 |
|-----------------|---------------------|-------------|-------------------------------------------------|
| T <sub>1</sub>  | ---                 | 2.3301      | H→L(0.57)<br>H→L+1(-0.22)                       |
| T <sub>2</sub>  | ---                 | 3.1136      | H→L(-0.31)<br>H→L+1(-0.37)<br>H→L+2(0.39)       |
| T <sub>3</sub>  | ---                 | 3.1942      | H-1→L(0.28)<br>H-1→L+1(0.47)                    |
| S <sub>1</sub>  | 0.1431              | 3.3377      | H-1→L(-0.20)<br>H→L(0.64)                       |
| S <sub>2</sub>  | 0.0836              | 3.7126      | H-1→L(0.37)<br>H-1→L+1(0.50)                    |
| S <sub>3</sub>  | 0.2852              | 3.8145      | H-4→L(-0.21)<br>H→L+1(0.531)                    |
| S <sub>4</sub>  | 0.0564              | 4.0439      | H-3→L(0.53)<br>H-3→L+1(0.31)                    |
| S <sub>5</sub>  | 0.1330              | 4.0922      | H-4→L(-0.27)<br>H-3→L(0.25)<br>H-1→L+1(0.28)    |
| S <sub>6</sub>  | 0.0309              | 4.1818      | H-4→L(-0.23)<br>H-1→L(0.34)<br>H-1→L+1(-0.23)   |
| S <sub>7</sub>  | 0.0056              | 4.3189      | H-3→L+1(0.28)<br>H-2→L(-0.25)<br>H-2→L+1(-0.21) |
| S <sub>8</sub>  | 0.0213              | 4.3534      | H-3→L(-0.30)<br>H-3→L+1(0.42)<br>H-2→L(0.21)    |
| S <sub>9</sub>  | 0.0421              | 4.4616      | H-4→L(0.38)<br>H-2→L+1(0.37)<br>H-2→L+2(0.22)   |
| S <sub>10</sub> | 0.0147              | 4.5454      | H-1→L+1(0.36)<br>H→L+1(-0.21)                   |

Table S11. The spin population (%) of the <sup>3</sup>ES (lowest triplet excited state), <sup>3</sup>MC and MECP states for complexes **1-4**. (L represents the ppy, Ncaz and Ndbt)

| Complexes | States          | Pt    | bzq   | L     |
|-----------|-----------------|-------|-------|-------|
| <b>1</b>  | <sup>3</sup> ES | 4.60  | 93.85 | 1.55  |
|           | MC              | 75.47 | 12.49 | 12.03 |
|           | MECP            | 74.88 | 12.63 | 12.49 |
| <b>2</b>  | <sup>3</sup> ES | 4.38  | 94.38 | 0.87  |
|           | MC              | 65.54 | 20.29 | 14.18 |
|           | MECP            | 65.17 | 19.72 | 15.11 |
| <b>3</b>  | <sup>3</sup> ES | 4.29  | 95.17 | 0.54  |
|           | MC              | 68.39 | 18.54 | 13.06 |
|           | MECP            | 67.98 | 18.71 | 13.31 |
| <b>4</b>  | <sup>3</sup> ES | 3.89  | 95.50 | 0.61  |
|           | MC              | 68.10 | 18.38 | 13.52 |
|           | MECP            | 67.66 | 18.44 | 13.89 |

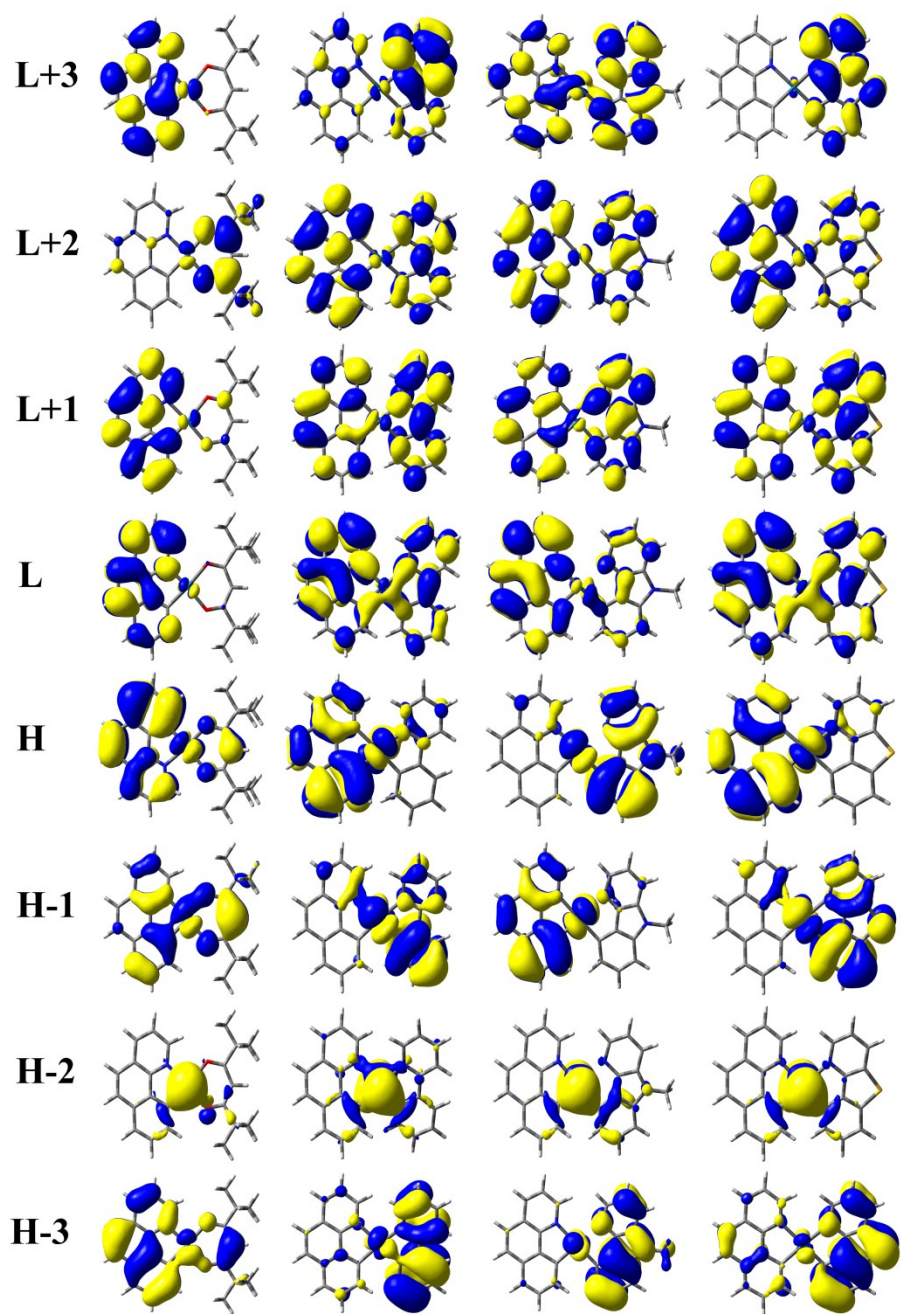

Fig S1. Molecular orbital (MO) distributions at the  $S_0$  state for complexes 1-4.

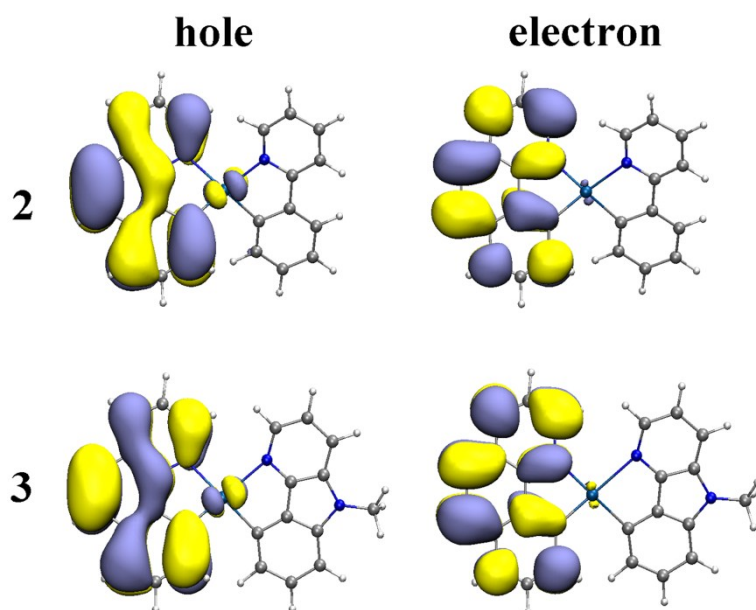

Fig S2. NTO plots at the  $T_1$  states for complexes **2** and **3**.

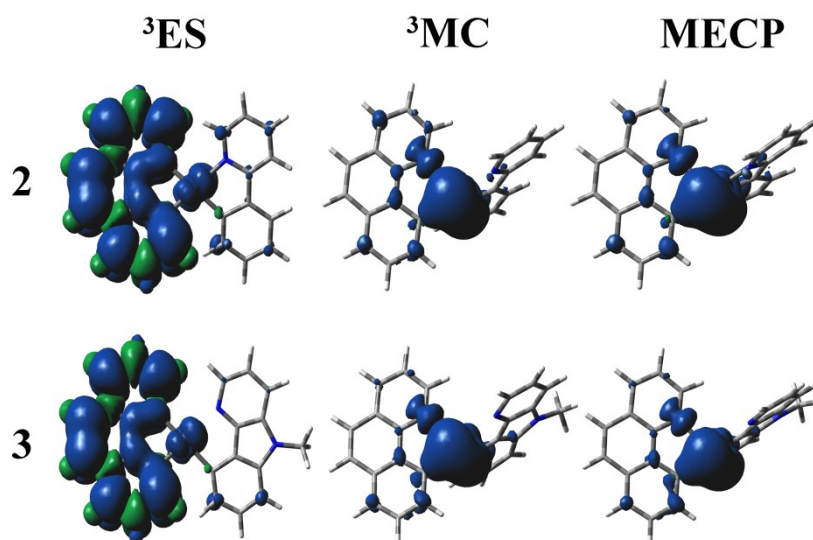

Fig S3. The spin density distribution of the lowest triplet excited state (left),  $^3MC$  (middle) and MECP (right) states for complexes **2** and **3**.

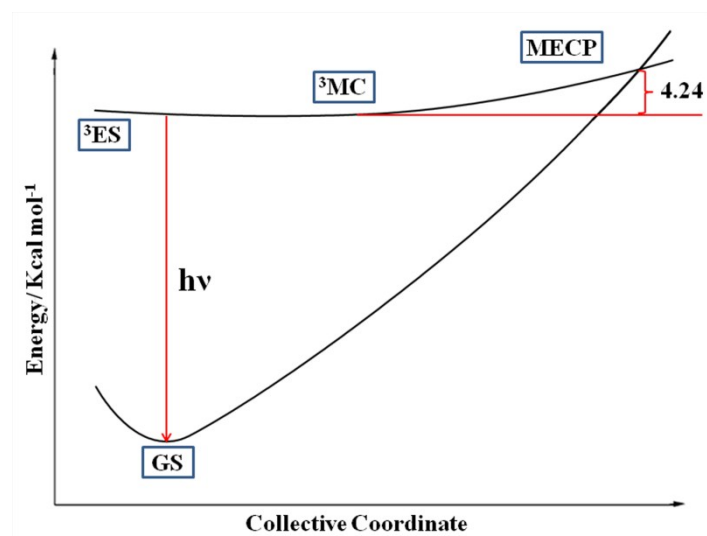

Fig S4. The intrinsic potential energy curve of complex 1.

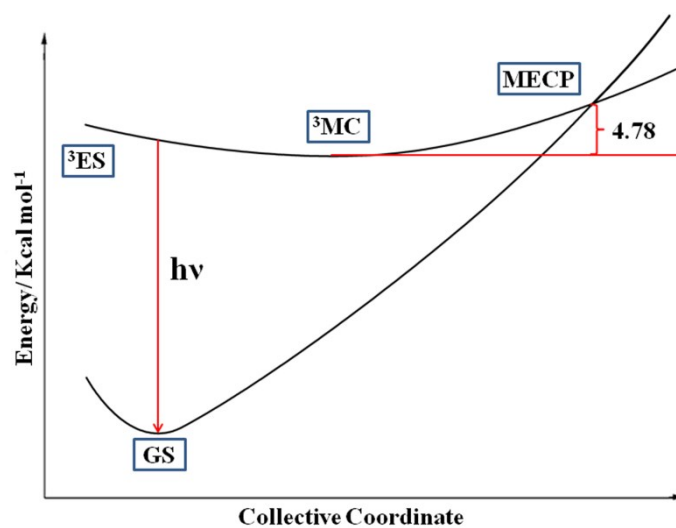

Fig S5. The intrinsic potential energy curve of complex 2.

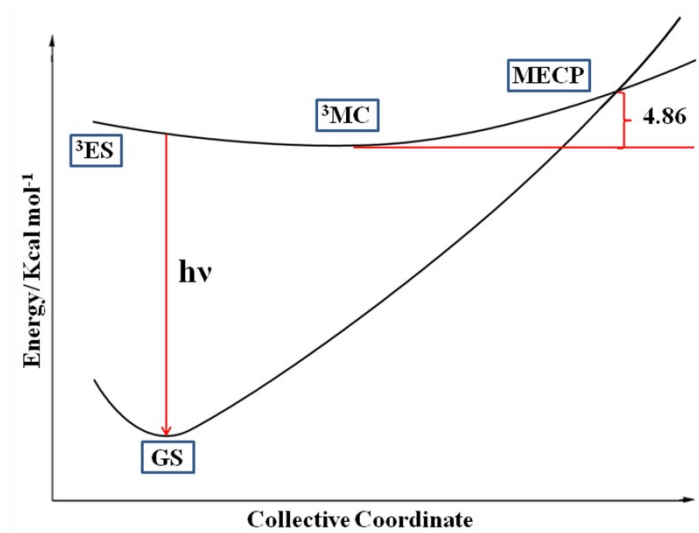

Fig S6. The intrinsic potential energy curve of complex 3.

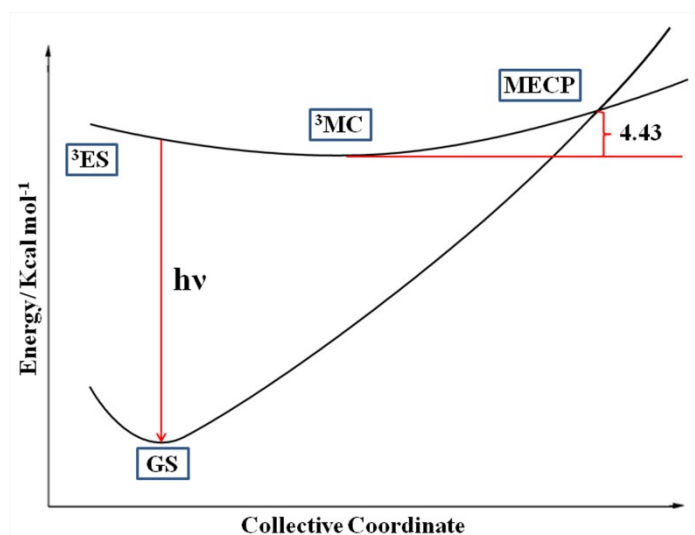

Fig S7. The intrinsic potential energy curve of complex 4.
